# Supplementary material for: Sex determination in the GIFT strain of tilapia is controlled by a locus in linkage group 23
Source: PubMed Central journal article supplement (PMC7189693; doi:10.1186/s12863-020-00853-3), 2020-04-29

**Stirling Family 1**

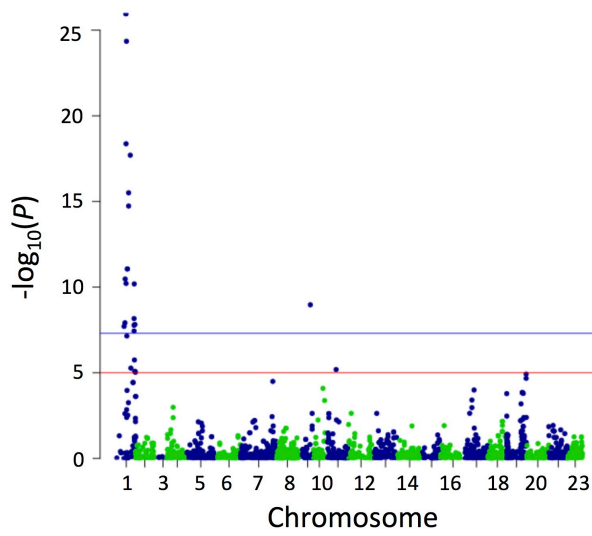

**Stirling Family 2**

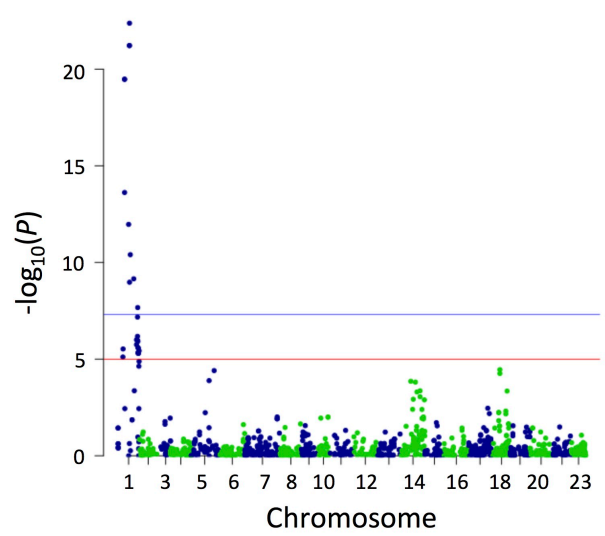

**GIFT Family 1**

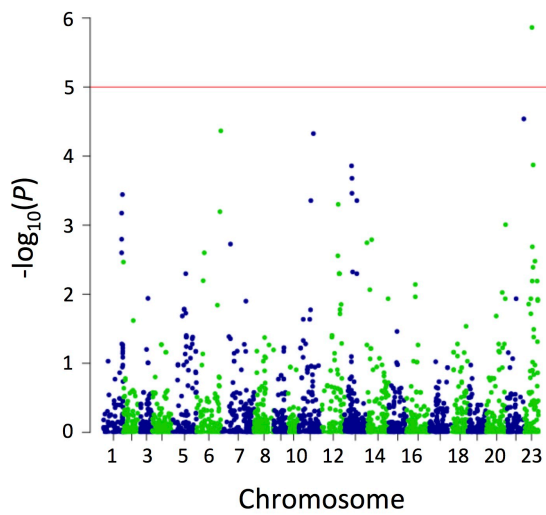

**GIFT Family 2**

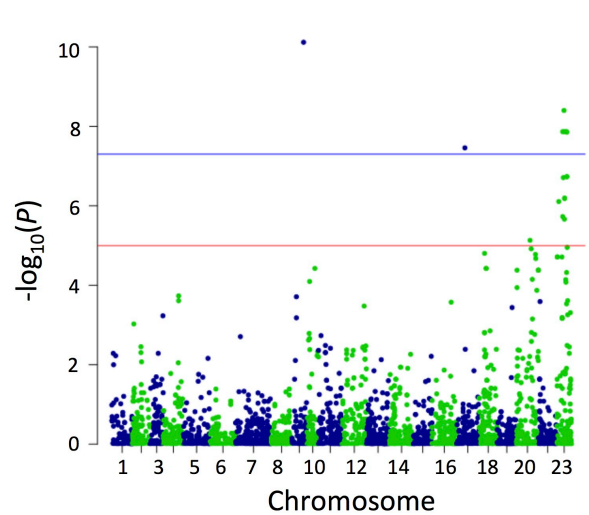

**GIFT Family 3**

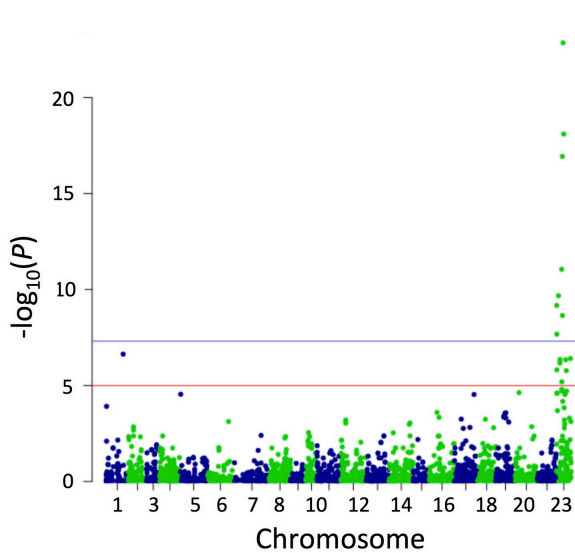

**GIFT Family 4**

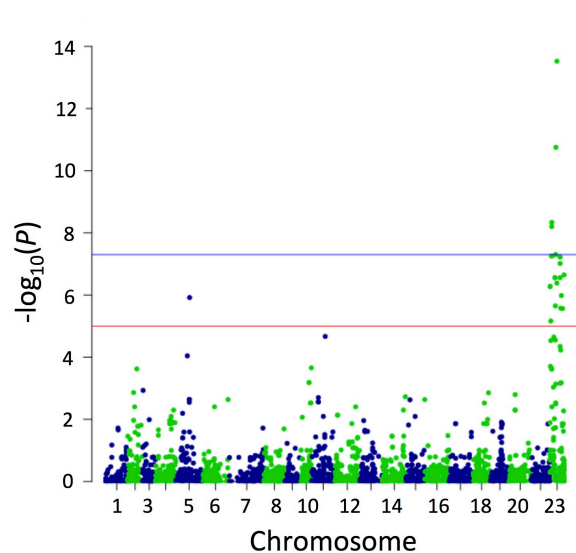

**GIFT Family 5**

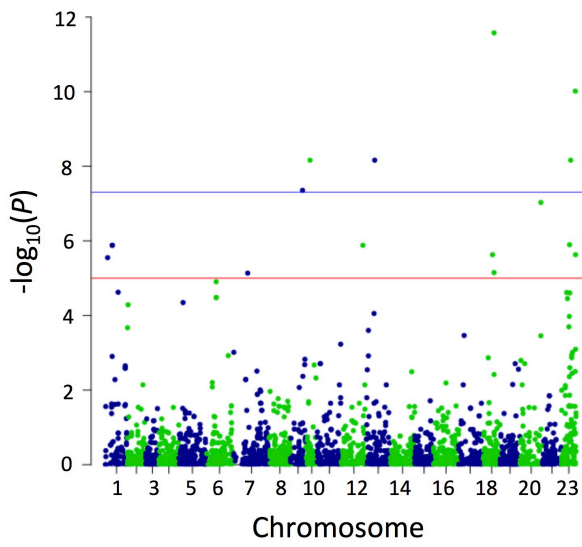

**GIFT Family 6**

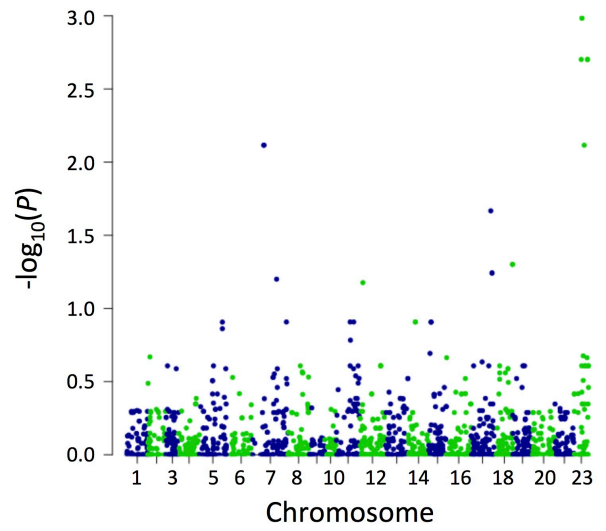

**GIFT Family 7**

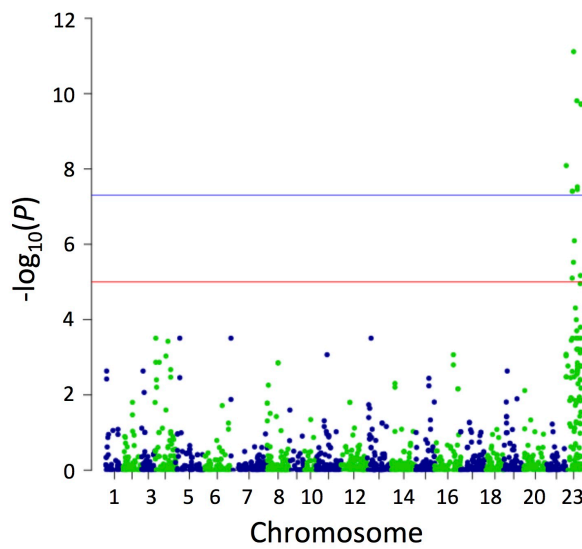

**GIFT Family 8**

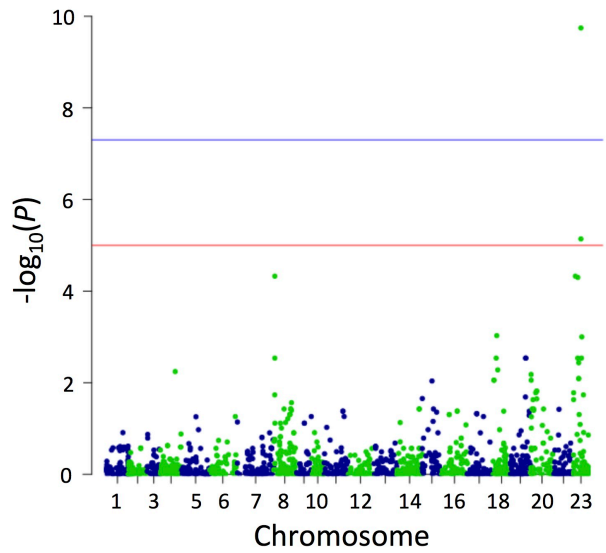

**GIFT Family 9**

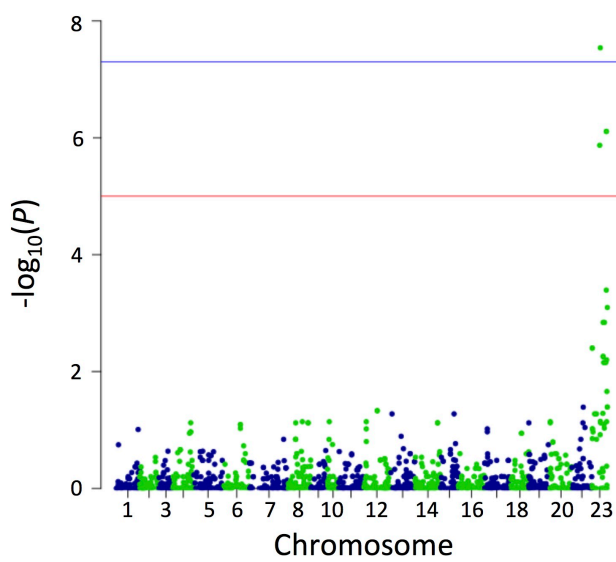

**GIFT Family 10**

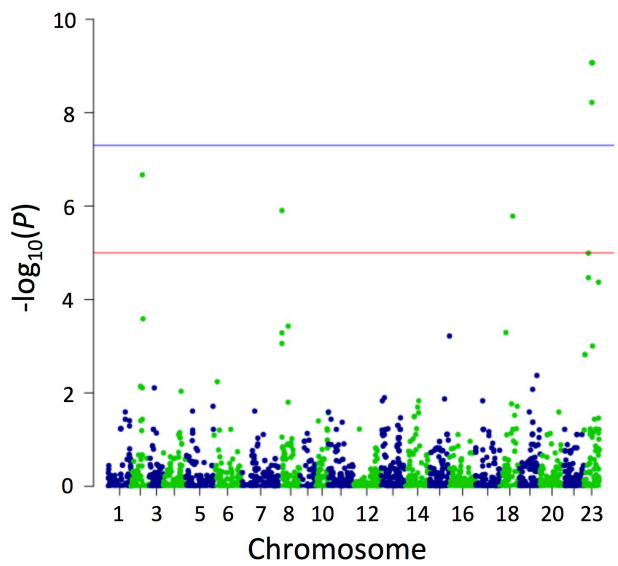

**GIFT Family 11**

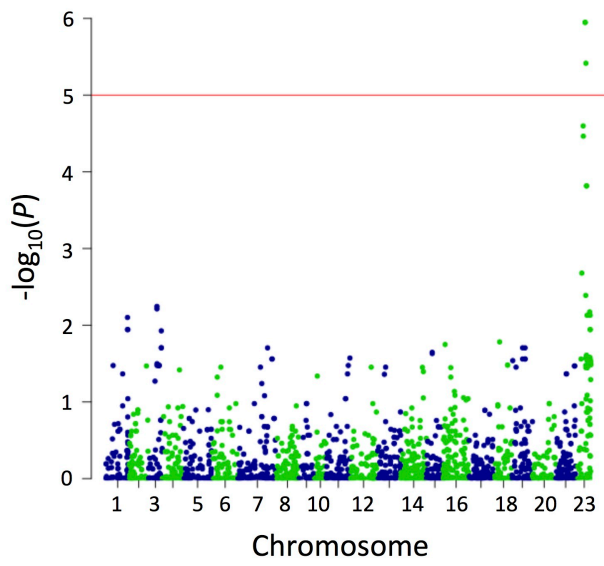

**GIFT Family 12**

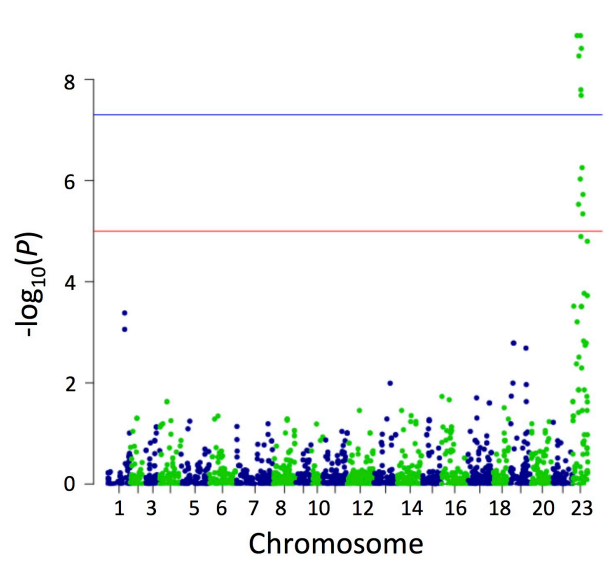

**GIFT Family 13**

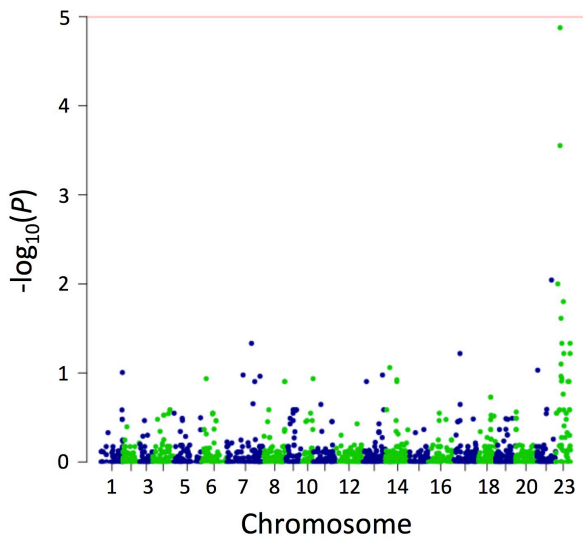

**GIFT Family 14**

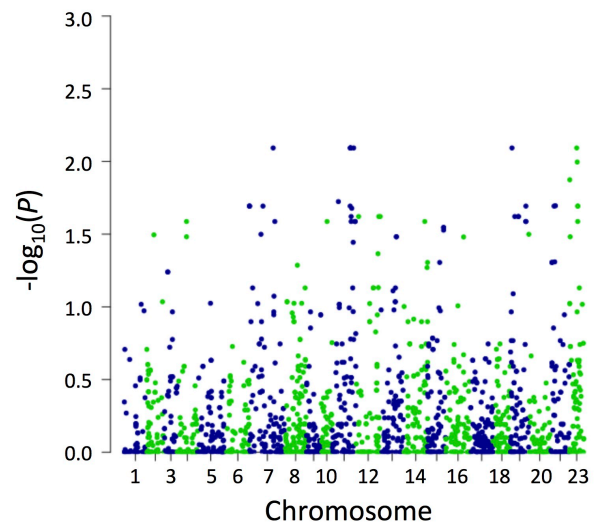

**GIFT Family 15**

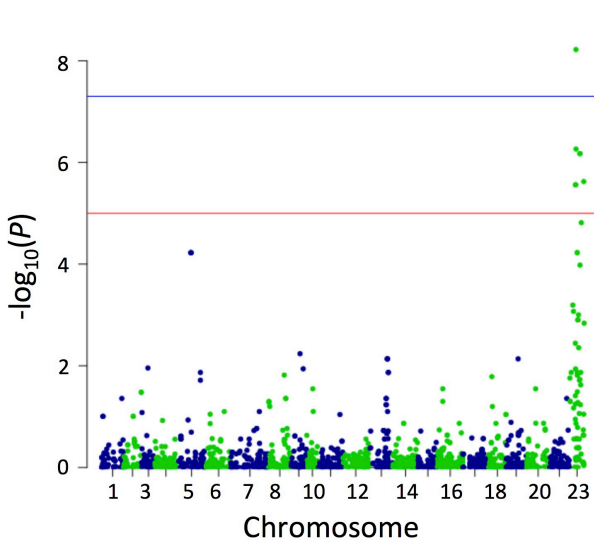

**GIFT Family 16**

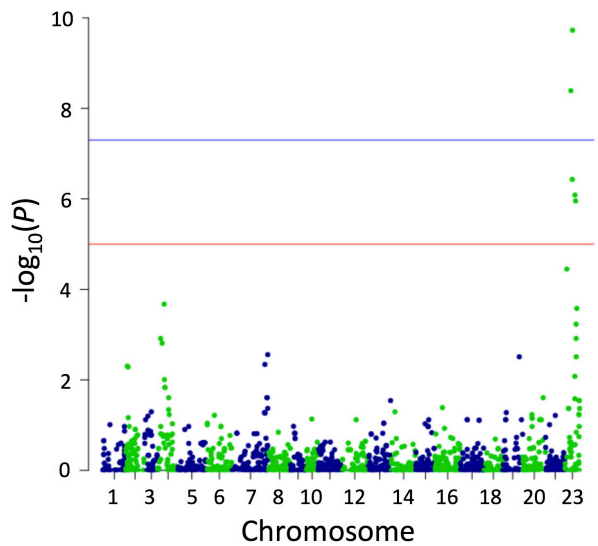

**GIFT Family 17**

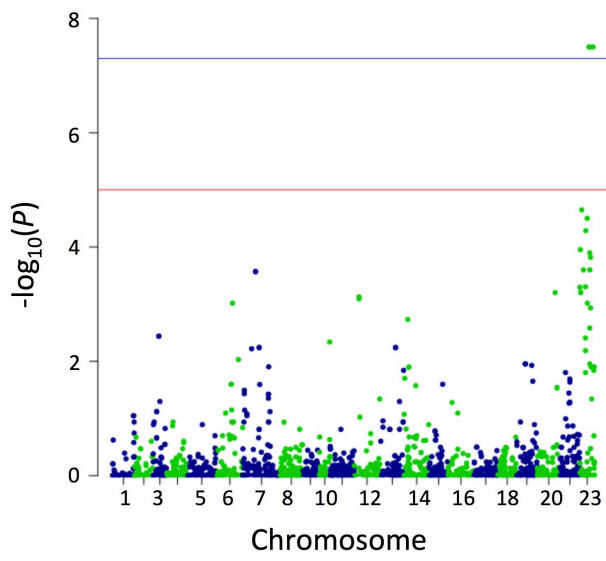

**GIFT Family 18**

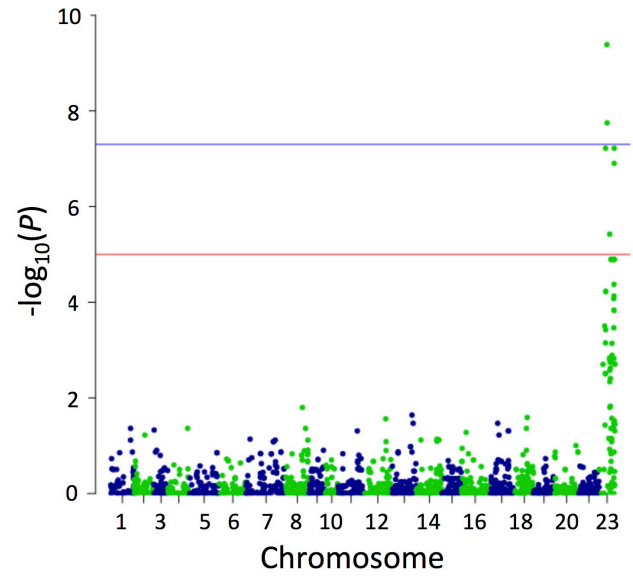

**GIFT Family 19**

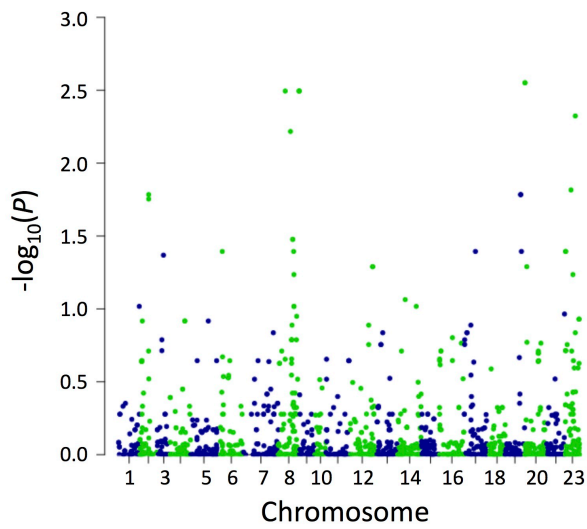

Supplement: 12863_2020_853_MOESM1_ESM.pdf [file 12863_2020_853_MOESM1_ESM.pdf]
